# ADVANCES IN GEOMETRY

## Anzeigenpreisliste 2/2009

gültig ab 1. Januar 2002

**Druckauflage:** 200 Exemplare  
**Druck:** Offset  
**Druckunterlagen:** pdf-Dateien direkt an

**AZ Druck und Datentechnik GmbH** per  
ISDN + 49 (831) / 206-473 (Leonardo)  
e-mail: [degruyter@az-druck.de](mailto:degruyter@az-druck.de)  
Datenträger an AZ Druck und Datentechnik GmbH  
Heisinger Str. 16, 87437 Kempten  
Tel.: 0831 / 206 - 185  
Fax.: 0831 / 206 - 369

**Eine Kopie der Anzeige mit dem Dateinamen an die Druckerei faxen.**

**Den Anzeigenauftrag und eine Kopie der Anzeige an den Verlag senden.**

**Erscheinungsweise:** jährlich 4 Hefte  
**Anzeigenschluß:** auf Anfrage  
**Zeitschriftenformat:** 240 mm hoch x 170 mm breit  
**Anzeigenpreise:**  
1/1 Seite 190mm hoch x 125 mm breit €300,-  
1/2 Seite 93mm hoch x 125 mm breit  
oder 190mm hoch x 62 mm breit €170,-  
Die gesetzliche Mehrwertsteuer wird zusätzlich berechnet.  
**Nachlässe:** bei 3maligem Erscheinen 3%  
bei 6maligem Erscheinen 5%  
**Beilagen:** auf Anfrage  
**Zahlungsbedingungen:** zahlbar nach Rechnungserhalt ohne Abzug von Skonto  
**Bankverbindungen:** Postbank Berlin 103 07-108 (BLZ 100 100 10)  
Berliner Bank AG 32 07523 500 (BLZ 100 200 00)  
**Allgemeines:** Der Verlag behält sich vor, Anzeigen nicht anzunehmen, wenn er gegen ihre Veröffentlichung Bedenken hat.  
Es gelten die umseitigen Allgemeinen Geschäftsbedingungen.  
**Anzeigenverwaltung:** Verlag Walter de Gruyter GmbH&Co.KG  
Dietlind Makswitat, Genthiner Str. 13, 10785 Berlin  
Telefon: (030) 260 05-131; Telefax: (030) 260 05-322  
e-mail : [anzeigen@degruyter.com](mailto:anzeigen@degruyter.com)
